# Supplementary material for: A porous Co3Mo3N/N-doped carbon electrocatalyst derived from Mo–Co MOFs for the electrochemical hydrogen evolution reaction
Source: Royal Society of Chemistry journal article supplement (doi:10.1039/d4nj02653e), 2024-01-01
Supplement: d4nj02653e1.pdf [file d4nj02653e1.pdf]

## Supporting information

### A porous Co<sub>3</sub>Mo<sub>3</sub>N/N-doped carbon electrocatalyst derived from Mo-Co MOF for electrochemical hydrogen evolution reaction

P. Mohana<sup>a</sup>, R. Yuvakkumar<sup>a\*</sup>, G. Ravi<sup>a,b\*</sup>, A. Arun<sup>c</sup>, S. Arun Metha<sup>d</sup>, P. Dhanasekaran<sup>e</sup>

<sup>a</sup>Department of Physics, Alagappa University, Karaikudi 630 003, Tamil Nadu, India

<sup>b</sup>Department of Physics, Chandigarh University, Mohali 140 413, Punjab, India

<sup>c</sup>Department of Microbiology, Alagappa University, Karaikudi 630 003, Tamil Nadu, India

<sup>d</sup>Department of Electronics and Communication Engineering, Koneru Lakshmaiah Education Foundation, Guntur, Andhra Pradesh 522 302, India

<sup>e</sup>Department of Physics, School of Distance Education, Bharathiar University, Coimbatore - 641 046

\*[yuvakkumarr@alagappauniversity.ac.in](mailto:yuvakkumarr@alagappauniversity.ac.in), [raviganesa@rediffmail.com](mailto:raviganesa@rediffmail.com)

### Electrochemical characterization towards HER:

All of the electrochemical measurements were conducted in 3 electrode using 1 M alkaline electrolyte solution at room temperature, Ag/AgCl used as reference and graphite rod as counter. All potentials vs Ag/AgCl was calibrated into reversible hydrogen electrode (RHE) based on standard Nernst equation followed by,  $E_{RHE} = E_{Ag/AgCl} + 0.059\text{pH} + E^{\circ}_{Ag/AgCl}$ . The LSV of fabricated electrodes were performed at the potential ranges 0 to -0.6 V vs RHE at the 2 mV/s. From this, overpotential values was estimated by using the formula,  $\eta = E_{RHE} - 0$  at minimum current density value of 10 mA/cm<sup>2</sup>. Additionally, intrinsic characteristics of the prepared catalyst were analysed by Tafel slope analysis by plotting a linear fit of log of current density (in mA cm<sup>-2</sup>) in X axis and overpotential at Y axis as per the equation of  $\eta = a + b \log j$ , where  $\eta$  - overpotential value,  $j$  denotes current density and  $b$  is Tafel slope. The measurement was conducted by taking steady state chronoamperometry test for 100 seconds at different potentials.

The cyclic voltammetry analysis of the fabricated electrodes was performed with 0.9 to 1.0 V vs RHE at various scan rates of 10 to 100 mV/s. From this CV curves, double layer capacitance ( $C_{dl}$ ) values was measured by the formula of  $C_{dl} = |j_a - j_c|/2$  at different scan rates

and the respective electrochemical active surface area (ECSA) was estimated by formula  $ECSA = C_{dl}/C_s$ , where  $C_s$  be specific capacitance of used substrate was taken as  $40 \text{ mF cm}^{-2}$ .

The electrochemical impedance spectroscopy (EIS) analysis was executed at frequency window of 10 mHz to 100 kHz with the amplitude of 5 mV. Also, the Zsimpwin software was employed to fit analysed EIS results. The chronoamperometry test (time vs current) of the prepared electrodes were analysed at low  $10 \text{ mA cm}^{-2}$  for prolong duration of 20 h. The polarization curves was analysed at  $10 \text{ A/cm}^2$  and compared with before and after the stability test.

**Table S1** Comparison table of overpotential, Tafel slope values of  $\text{Co}_3\text{Mo}_3\text{N/NC}$  electrocatalyst with previous literatures

| Catalyst                                                       | Overpotential $\eta$ (mV) | Tafel slope value (mV/dec) | Current density (mA/cm <sup>2</sup> ) | Electrolyte solution | Ref              |
|----------------------------------------------------------------|---------------------------|----------------------------|---------------------------------------|----------------------|------------------|
| Cobalt-molybdenum carbide@graphitic carbon nanocomposites      | 165                       | 130.3                      |                                       |                      | 104              |
| MOF derived Molybdenum Carbide/Nitride                         | 119                       | 54                         |                                       |                      | 105              |
| Co/CoN/Co <sub>2</sub> P-NPC                                   | 99                        | 51                         | 10                                    | KOH                  | 106              |
| NC/Ni <sub>3</sub> Mo <sub>3</sub> N/NF                        | 44.6                      | 41.50                      |                                       |                      | 107              |
| MoNiS/Mo <sub>2</sub> TiC <sub>2</sub> T <sub>x</sub> catalyst | 153                       | 92                         |                                       |                      | 108              |
| Co/WN@NC                                                       | 143                       | 90                         |                                       |                      | 109              |
| Co-Mo-P@C                                                      | 159                       | 131                        |                                       |                      | 110              |
| <b>Co<sub>3</sub>Mo<sub>3</sub>N/NC</b>                        | <b>125</b>                | <b>98.49</b>               |                                       |                      | <b>This work</b> |
